# Supplementary material for: Verteporfin exhibits YAP-independent anti-proliferative and cytotoxic effects in endometrial cancer cells
Source: PubMed Central journal article supplement (PMC5438678; doi:10.18632/oncotarget.15614), 2017-02-22
Supplement: oncotarget-08-28628-s001.pdf [file oncotarget-08-28628-s001.pdf]

## Verteporfin exhibits YAP-independent anti-proliferative and cytotoxic effects in endometrial cancer cells

### SUPPLEMENTARY FIGURES AND TABLES

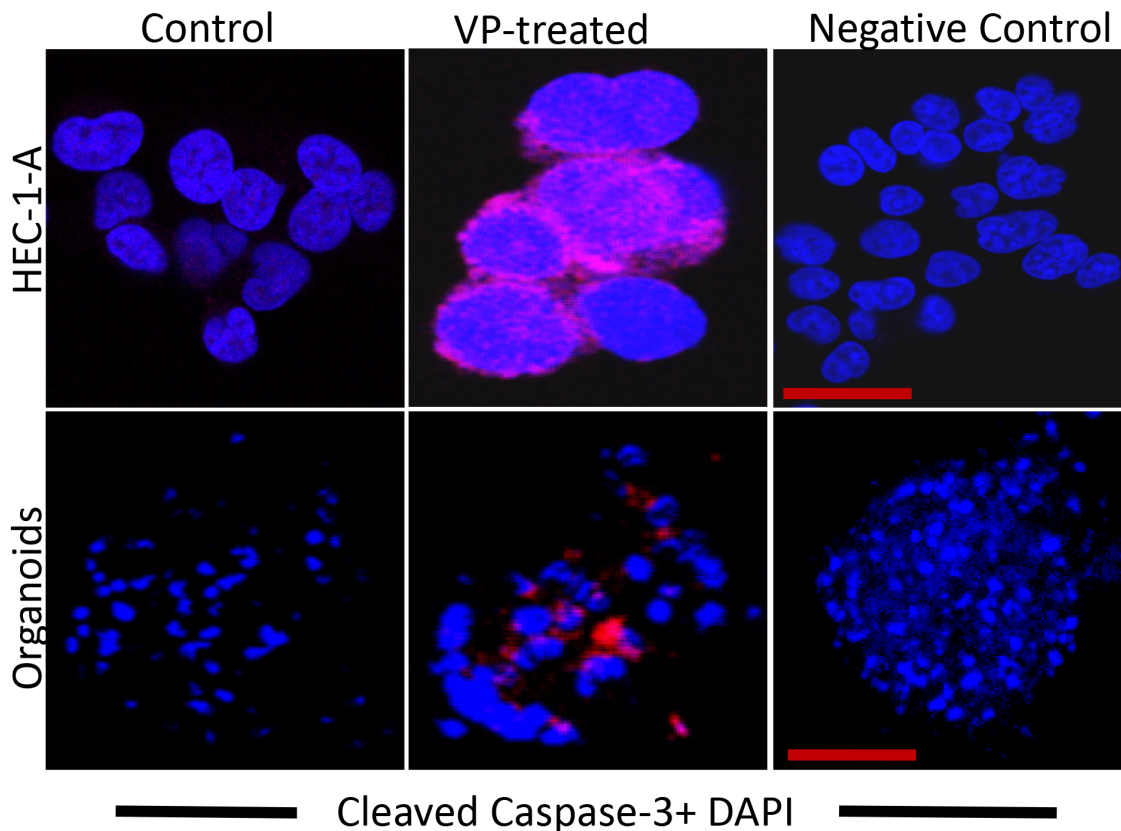

**Supplementary Figure 1: VP induces caspase-3 mediated apoptosis in HEC-1-A Cells and patient derived organoids.** HEC-1-A cells and patient derived organoids (#1002) were subjected to immunofluorescence detection for cleaved caspase-3 after VP treatment. Cleaved-caspase-3 (anti-rabbit) are conjugated with goat anti-rabbit Alexa flour secondary antibodies. Bar for HEC-1-A = 63x and Bar for organoids is =20x. n=3.

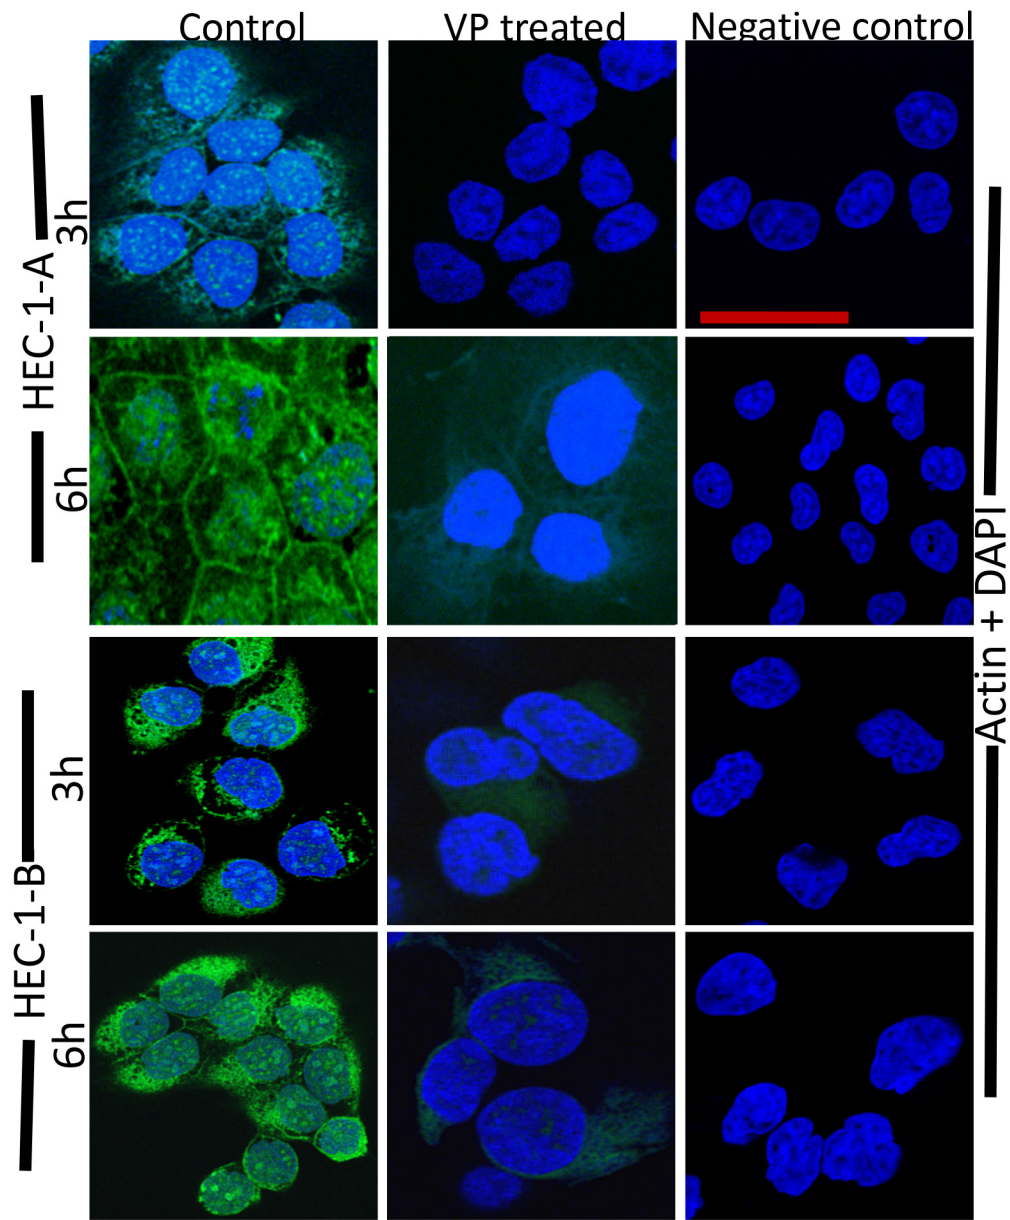

**Supplementary Figure 2: VP induces phenotypic changes in EMCA cells.** HEC-1-A and HEC-1-B cells were subjected to VP treatment for 3h and 6h and probed with actin antibody. This Actin antibody detects all isoforms of actin in the cells. Actin antibody (anti-goat) is conjugated with donkey anti-goat Alexa flour secondary antibodies. Bar=63x. n=3.

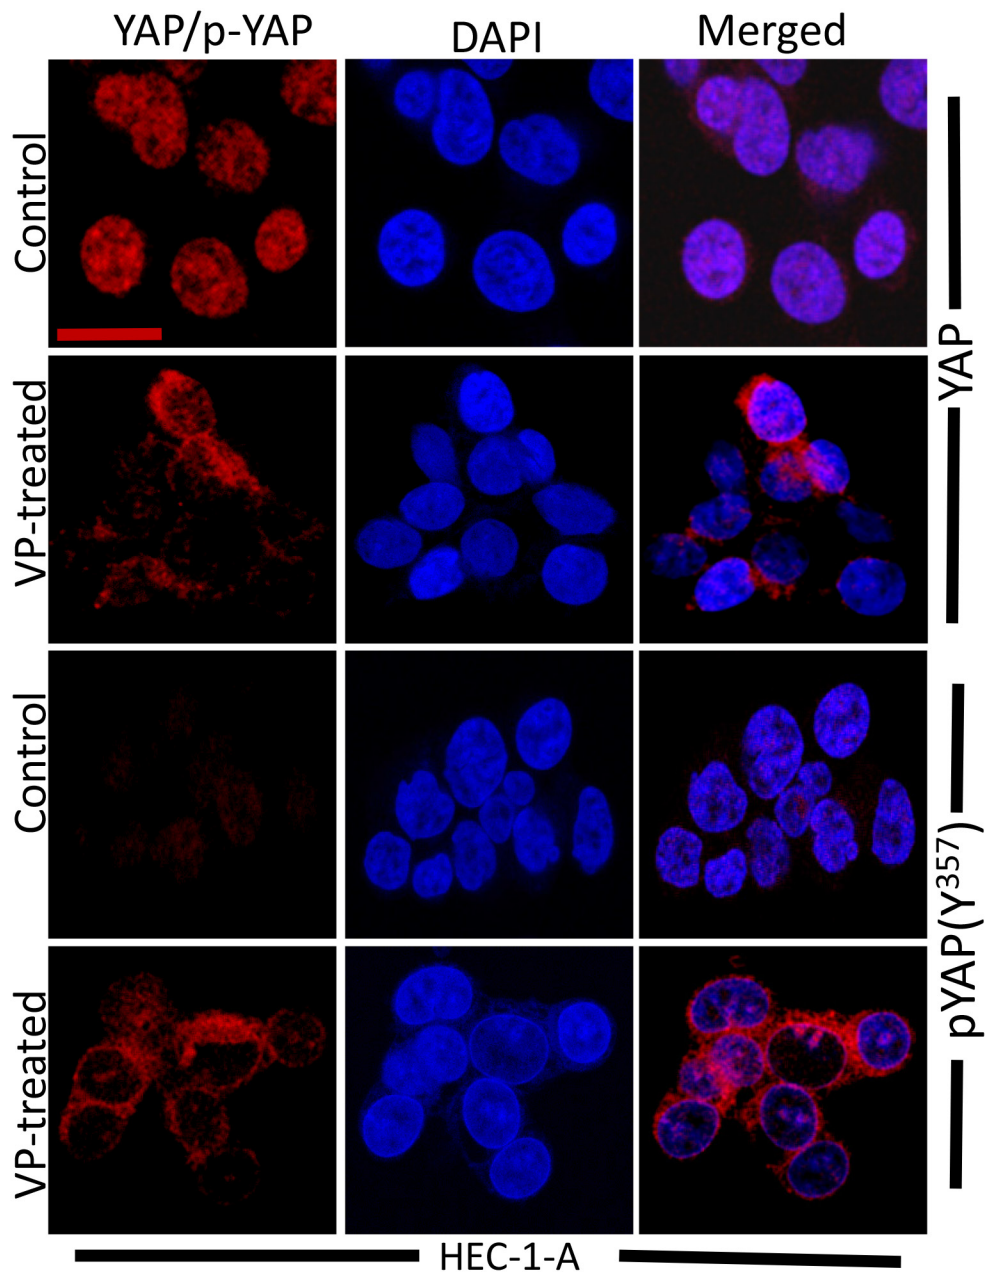

**Supplementary Figure 3: VP downregulates YAP and phospho-YAP of HEC-1-A Cells.** Confocal images of HEC-1-A cells that were subjected to immunofluorescence detection for YAP and phospho-YAP (Y<sup>357</sup>) after VP treatment. YAP (anti-mouse) and phospho-YAP (anti-rabbit) are conjugated with goat anti-mouse and goat anti-rabbit Alexa flour secondary antibodies. Bar=63x. n=3.

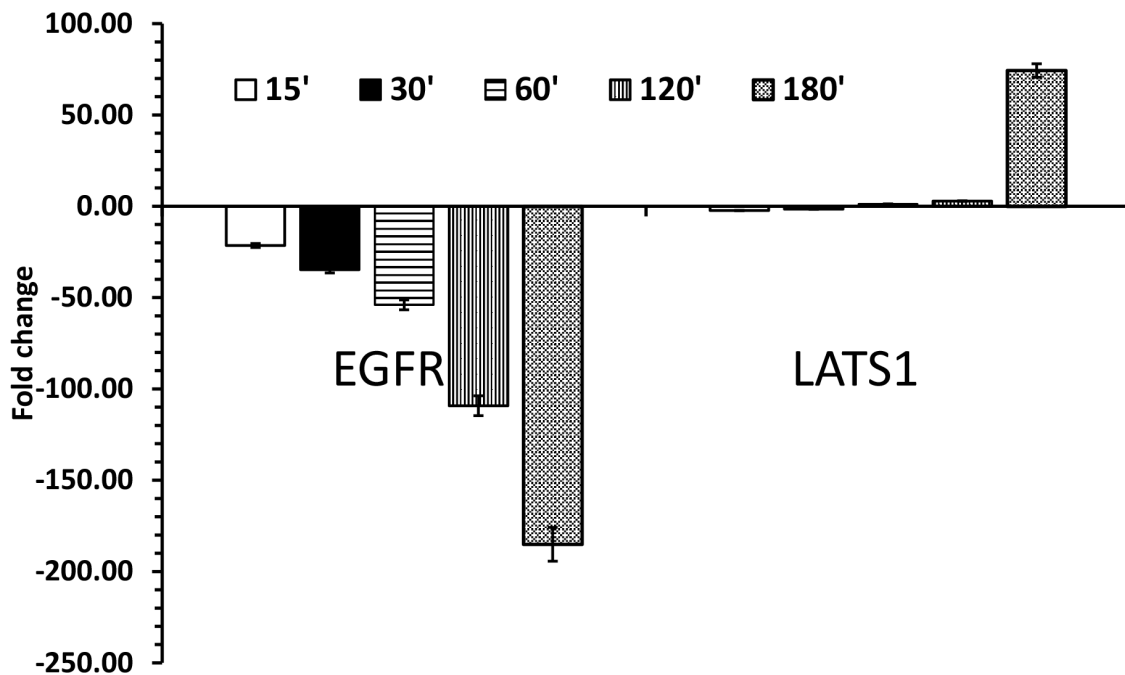

**Supplementary Figure 4: RTPCR analysis of EGFR AND LATS1.** Both the genes were normalized to the expression of GAPDH,  $\beta$ -actin, PGK1, LDHA and PPIH. Error bars indicate Mean  $\pm$ SEM. For each gene, duplicates were performed from 3 different samples for each treatment. n=6.

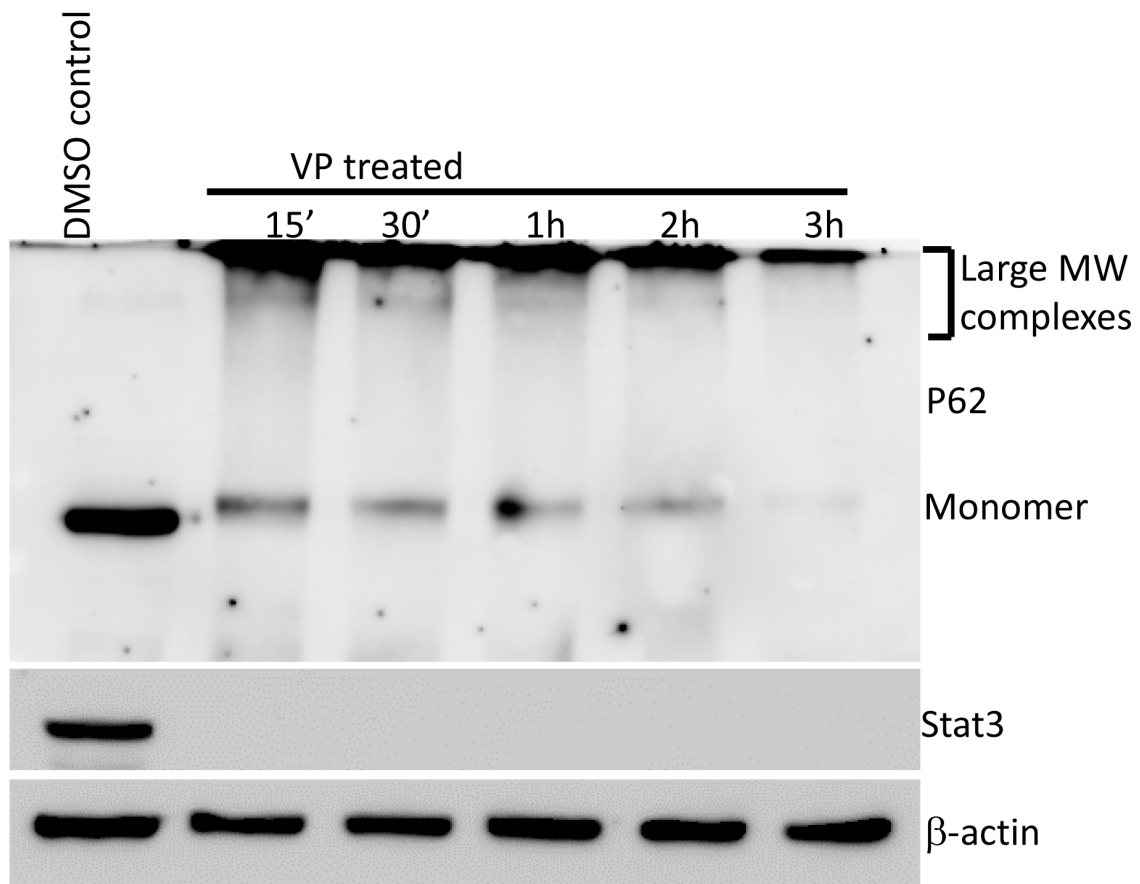

**Supplementary Figure 5: Western blot time course of VP effect on p62 and Stat3.** Equal amounts of proteins (40 $\mu$ g) from untreated and treated (10 nM VP, different time points) EMCA cells were loaded on 8% gels and transferred onto nylon membranes, which were then probed with respective antibodies. They were reprobbed with  $\beta$ -actin which was used a positive loading control. n=3.

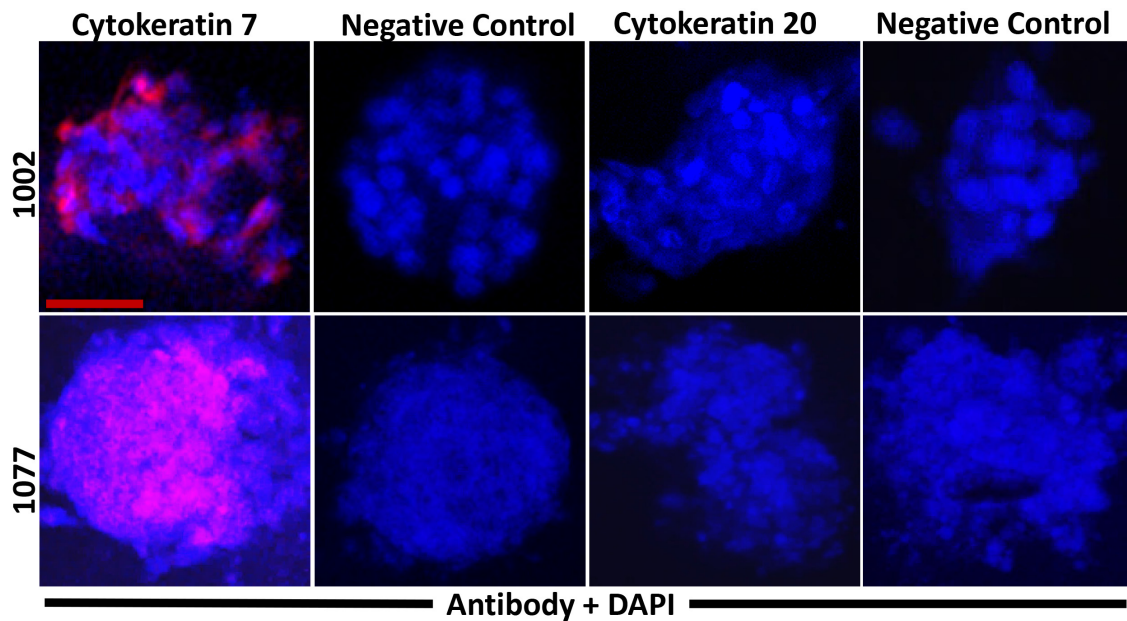

**Supplementary Figure 6: Characterization of organoids based on molecular markers.** Confocal images of patient derived organoids (#1002 and #1077) which were subjected to immunofluorescence detection of cytokeratin 7 (CK7) and cytokeratin 20 (CK20) in organoids. CK7 and CK20 are conjugated with goat anti-mouse and goat anti-rabbit Alexa flour secondary antibodies respectively. Bar=63x. Negative controls do not have primary antibodies. n=3.



**Supplementary Table 1: Fold change of Hippo Signaling pathway genes in endometrial cancer cells after Verteporfin treatment**

| NM No.       | Gene Description | Fold change after VP treatment |         |             |         |
|--------------|------------------|--------------------------------|---------|-------------|---------|
|              |                  | HEC1A                          |         | HEC1B       |         |
|              |                  | Fold change                    | p-value | Fold change | p-value |
| NM_133265    | AMOT             | -1.36                          | 0.3196  | 2.44        | 0.6605  |
| NM_057749    | CCNE2            | -1.35                          | 0.3641  | 1.36        | 0.9858  |
| NM_005245    | FAT1             | -3.73                          | 0.2580  | -1.86       | 0.4912  |
| NM_004466    | GPC5             | 29.47                          | 0.5937  | 1.39        | 0.4226  |
| NM_014240    | LIMD1            | 1.31                           | 0.2952  | 1.51        | 0.9492  |
| NM_004140    | LLGL1            | -1.38                          | 0.2549  | 2.66        | 0.6359  |
| NM_002398    | MEIS1            | 5.02                           | 0.6852  | 3.29        | 0.5429  |
| NM_173468    | MOB1B            | 2.55                           | 0.5503  | 1.54        | 0.9400  |
| NM_020998    | MST1             | 7.15                           | 0.8382  | -1.29       | 0.6566  |
| NM_000268    | NF2              | -1.54                          | 0.2548  | 2.30        | 0.6973  |
| NM_001099771 | POTEF            | 2.10                           | 0.5223  | 1.34        | 0.9757  |
| NM_014737    | RASSF2           | 3.19                           | 0.5397  | 1.62        | 0.9228  |
| NM_032023    | RASSF4           | 6.13                           | 0.6922  | 3.36        | 0.5517  |
| NM_182706    | SCRIB            | 2.67                           | 0.4117  | 1.44        | 0.9825  |
| NM_005900    | SMAD1            | -2.07                          | 0.3358  | 2.75        | 0.6109  |
| NM_000116    | TAZ              | 1.28                           | 0.3162  | 1.80        | 0.8420  |
| NM_003214    | TEAD3            | -1.54                          | 0.2892  | 2.67        | 0.5952  |
| NM_004817    | TJP2             | -1.73                          | 0.2232  | 1.59        | 0.9239  |
| NM_003722    | TP63             | 23.60                          | 0.9766  | 2.70        | 0.1247  |
| NM_173485    | TSHZ2            | 59.69                          | 0.0466  | 2.2         | 0.4226  |
| NM_020856    | TSHZ3            | 10.73                          | 0.4226  | 1.48        | 0.3815  |
| NM_006106    | YAP1             | 1.23                           | 0.3554  | 1.78        | 0.8473  |

Results are based on cDNA PCR profiler RTPCR array experiments. n=2.  
p values are based 1-way ANOVA (DMSO control vs. VP treatments).

Supplementary Table 2: Table showing details of primary antibodies used

| Antigen                       | Type              | Dilution | Manufacturer               |
|-------------------------------|-------------------|----------|----------------------------|
| $\beta$ -actin                | Mouse monoclonal  | 1:1000   | Santa Cruz                 |
| Akt                           | Mouse monoclonal  | 1:500    | Santa Cruz                 |
| p-Akt1/2/3 Antibody (Ser 473) | Rabbit monoclonal | 1:300    | Santa Cruz                 |
| Caspase-3                     | Rabbit polyclonal | 1:500    | Santa Cruz                 |
| Cleaved caspase-3             | Rabbit polyclonal | 1:500    | Santa Cruz                 |
| CTGF                          | Mouse monoclonal  | 1:500    | Santa Cruz                 |
| Cytokeratin-7                 | Mouse monoclonal  | 1:50     | Santa Cruz                 |
| Cytokeratin-8                 | Rabbit polyclonal | 1:50     | Santa Cruz                 |
| EGFR                          | Rabbit polyclonal | 1:300    | Santa Cruz                 |
| EGFR                          | Mouse monoclonal  | 1:300    | Santa Cruz                 |
| GAPDH                         | Mouse monoclonal  | 1:1000   | Santa Cruz                 |
| LATS1                         | Rabbit polyclonal | 1:500    | Santa Cruz                 |
| NF2                           | Rabbit polyclonal | 1:250    | Santa Cruz                 |
| PI3K                          | Rabbit polyclonal | 1:300    | Cell Signaling Technology  |
| RASSF1                        | Mouse monoclonal  | 1:500    | LifeSpan BioSciences, Inc. |
| TAZ                           | Rabbit polyclonal | 1:500    | Santa Cruz                 |
| TEAD3                         | Rabbit polyclonal | 1:250    | Abcam                      |
| YAP                           | Mouse monoclonal  | 1:500    | Santa Cruz                 |
| Phospho-YAP (y357)            | Rabbit polyclonal | 1:250    | Abcam                      |



**Supplementary Table 3: Table showing details of secondary antibodies used**

| Type                                 | Dilution | Manufacturer                |
|--------------------------------------|----------|-----------------------------|
| Goat Anti-Rabbit IgG-HRP             | 1:5000   | Boston Bioproducts          |
| Goat Anti-Mouse IgG-HRP              | 1:5000   | Boston Bioproducts          |
| Alexa Flour 594 Goat Anti-Mouse IgG  | 1:100    | Invitrogen Molecular Probes |
| Alexa Flour 594 Goat Anti-Rabbit IgG | 1:100    | Invitrogen Molecular Probes |

**Supplementary Table 4: Details of the primer sequences used in the study**

| NM No.       | Gene    | Forward sequence (5'→3')  | Reverse sequence (5'→3') |
|--------------|---------|---------------------------|--------------------------|
| NM_001901.2  | CTGF    | GCCAGAGAGTGAGAGACATTAAC   | GTGAGGCTACCACATTTCTAC    |
| NM_000268    | NF2     | CTCCAGACCTAGAGCGTAAGTA    | GAAGTAGACACGGCAGCTAAA    |
| NM_032023    | RASSF4  | CTGCAGACAAGAGGAAGAGAAG    | GTAGAAAGTGCCGTTGATAGAG   |
| NM_000116    | TAZ     | CTTGCTGCCTTCTGGATTCT      | TTGCTCACCTGCCTTCTATG     |
| NM_003214    | TEAD3   | TTCAGACTGGGCATGAAGAAG     | CTGCTACTCTAGGCAGGTAGAT   |
| NM_001130145 | YAP1    | TTCCTTAACAGTGGCACCTATC    | TCTGCCTGAGGGCTCTATAA     |
| NM_004690    | LATS1   | CAAGGACAGAGAGGCATTAGTT    | GGTATCCAAGAAGGGTGTGTAG   |
| NM_005228    | EGFR    | GCTGGATGATAGACGCAGATAG    | TGGGAACGGACTGGTTTATG     |
| NM_001101    | β-ACTIN | GAAGTCCCTTGCCATCTAAA      | GTCTCAAGTCAGTGTACAGGTAAG |
| NM_002046    | GAPDH   | TGATGACATCAAGAAGGTGGTGAAG | TCCTTGGAGGCCATGTGGGCCAT  |
| NM_006347    | PPIH    | CACCTTCCACAGGGTCATAAA     | ACTCAAGAACACCACCAAGAA    |
| NM_000291    | PGK1    | GATTACCTTGCCTGTTGACTTTG   | AGTGTCTCCACCACCTATGA     |
| NM_005566    | LDHA    | GCCTGTGCCATCAGTATCTT      | TGCAGTTCGGGCTGTATTT      |

All the primer sequences are based on human gene sequences. The primers were designed using PrimerQuest tool and obtained from Integrated DNA Technologies, Inc. (IDT).
